# Supplementary material
Source: publisher site journal article supplement (https://www.spandidos-publications.com/8403/downloadSupplementary)
Supplement: Supplementary file 1 [file downloadSupplementary]

## Sheet: Sheet1
Table SII. Differential mitochondrial autophagy-related genes.
gene_name	baseMean	log2FoldChange	lfcSE	stat	pvalue	padj	sig
PRKN	197.433	-1.83806	0.104358	-17.613	1.957e-69	7.51612e-68	down
NOD2	473.632	1.48019	0.11008	13.4464	3.23201e-41	5.0291e-40	up
CERS1	35.2233	1.23926	0.192661	6.43232	1.25667e-10	4.71177e-10	up
TOMM40	3749.34	1.24314	0.0737172	16.8637	8.32659e-64	2.66718e-62	up
